DECEMBER 2021 | VOLUME 178 | NUMBER 12

# The American Journal of Psychiatry

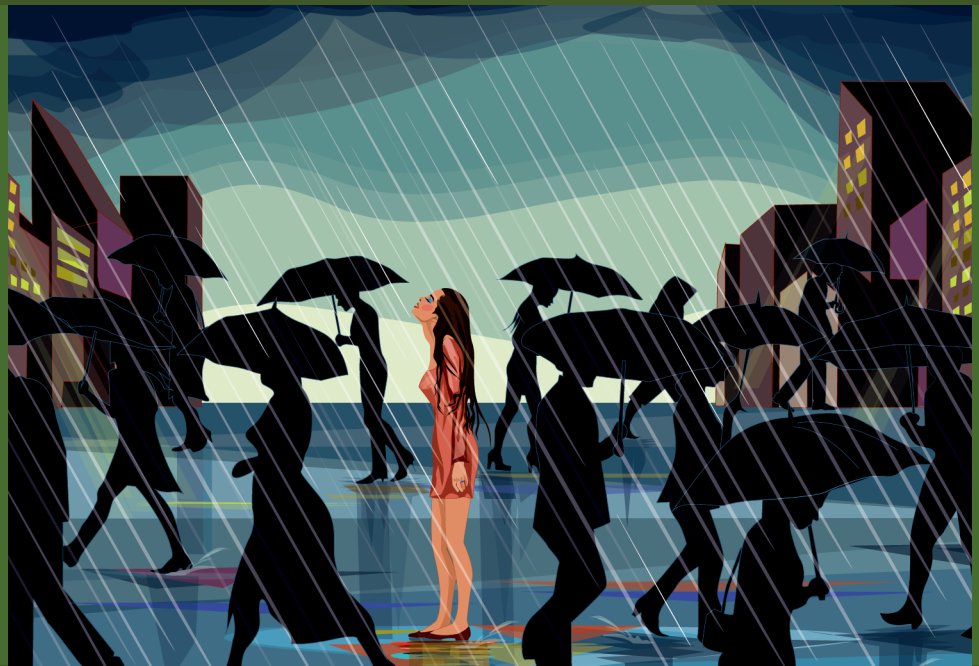

Neuromodulation Strategies for the Treatment of Depression

Efficacy and Safety of Lumateperone for Major Depressive  
Episodes Associated with Bipolar I or Bipolar II Disorder

Association Between Systemic Inflammation and Individual  
Symptoms of Depression

Coordinate-Based Network Mapping of Brain Structure in  
Major Depressive Disorder in Younger and Older Adults

AMERICAN  
PSYCHIATRIC  
ASSOCIATION

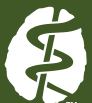

[ajp.psychiatryonline.org](http://ajp.psychiatryonline.org)

DECEMBER 2021

VOLUME 178 | NUMBER 12

THE AMERICAN JOURNAL OF PSYCHIATRY
